# Supplementary material for: Glacial to interglacial climate variability in the southeastern African subtropics (25–20° S)
Source: Copernicus journal article supplement (doi:10.5194/cp-2019-158), 2020-01-23
Supplement: Supplementary file [file cp-2019-158-AC2-supplement.pdf]

Supplement 1: GeoB20616-1 Oxygen and carbon isotopic composition of planktonic foraminifera.

| <b>age</b><br><b>(cal. yrs BP)</b> | <b>depth</b><br><b>(cm)</b> | <b><math>\delta^{18}\text{O}</math></b><br><b>(‰ VPDB)</b> | <b><math>\delta^{13}\text{C}</math></b><br><b>(‰ VPDB)</b> |
|------------------------------------|-----------------------------|------------------------------------------------------------|------------------------------------------------------------|
| 37173                              | 395                         | -0.44                                                      | 0.554                                                      |
| 45285                              | 455                         | -0.65                                                      | 0.709                                                      |
| 50017                              | 490                         | -0.58                                                      | 0.276                                                      |
| 52045                              | 505                         | -0.72                                                      | 0.669                                                      |
| 57453                              | 545                         | -0.63                                                      | 0.622                                                      |
| 65565                              | 605                         | -0.73                                                      | 0.435                                                      |
| 68945                              | 630                         | -0.87                                                      | 0.624                                                      |
| 75029                              | 675                         | -0.35                                                      | 0.267                                                      |
| 77733                              | 695                         | -0.39                                                      | 1.277                                                      |
| 85845                              | 755                         | -1.03                                                      | 0.954                                                      |
| 87197                              | 765                         | -0.93                                                      | 0.719                                                      |
| 88549                              | 775                         | -1.03                                                      | 0.683                                                      |
| 89901                              | 785                         | -1.00                                                      | 0.267                                                      |
| 91253                              | 795                         | -0.86                                                      | 0.772                                                      |
| 93281                              | 810                         | -1.37                                                      | 0.519                                                      |
| 94633                              | 820                         | -1.00                                                      | 0.125                                                      |
| 95985                              | 830                         | -1.25                                                      | 1.091                                                      |
| 96525                              | 834                         | -1.27                                                      | 0.519                                                      |
| 98013                              | 845                         | -1.27                                                      | 0.561                                                      |
| 99365                              | 855                         | -1.10                                                      | 0.711                                                      |
| 100717                             | 865                         | -0.77                                                      | 0.625                                                      |
| 102069                             | 875                         | -1.27                                                      | 0.663                                                      |
| 103421                             | 885                         | -1.42                                                      | 0.939                                                      |
| 104773                             | 895                         | -1.16                                                      | 0.147                                                      |
| 106125                             | 905                         | -1.66                                                      | 0.208                                                      |
| 107477                             | 915                         | -1.58                                                      | 0.927                                                      |
| 108829                             | 925                         | -1.29                                                      | 0.616                                                      |
| 110181                             | 935                         | -1.56                                                      | 0.101                                                      |

Supplement 2:GeoB20616-1 downcore sea surface temperatures (SST) calculated following Lea et al. 2003 using the listed ICP-OES measurement results.

| <b>age<br/>(cal. yrs BP)</b> | <b>depth<br/>(cm)</b> | <b>Mg/Ca</b> | <b>SST (°C)</b> |
|------------------------------|-----------------------|--------------|-----------------|
| 5179                         | 40.5                  | 4.38         | 27.5            |
| 16512                        | 145.5                 | 3.77         | 25.8            |
| 21125                        | 195.5                 | 3.44         | 24.7            |
| 23832                        | 245.5                 | 3.40         | 24.6            |
| 26461                        | 295.5                 | 3.26         | 24.1            |
| 32869                        | 345.5                 | 3.89         | 26.1            |
| 38427                        | 385.5                 | 3.40         | 24.6            |
| 39467                        | 395.5                 | 2.97         | 23.1            |
| 40712                        | 410.5                 | 3.42         | 24.7            |
| 41542                        | 420.5                 | 3.20         | 23.9            |
| 42372                        | 430.5                 | 3.44         | 24.7            |
| 43202                        | 440.5                 | 3.53         | 25.0            |
| 44447                        | 455.5                 | 3.37         | 24.5            |
| 45692                        | 470.5                 | 3.35         | 24.5            |
| 46522                        | 480.5                 | 3.30         | 24.3            |
| 47352                        | 490.5                 | 3.09         | 23.5            |
| 48597                        | 505.5                 | 3.28         | 24.2            |
| 49012                        | 510.5                 | 3.44         | 24.8            |
| 49842                        | 520.5                 | 3.33         | 24.4            |
| 50258                        | 525.5                 | 3.26         | 24.2            |
| 51088                        | 535.5                 | 3.60         | 25.3            |
| 51918                        | 545.5                 | 3.28         | 24.2            |
| 52748                        | 555.5                 | 3.60         | 25.3            |
| 53578                        | 565.5                 | 3.48         | 24.9            |
| 54408                        | 575.5                 | 3.61         | 25.3            |
| 55238                        | 585.5                 | 3.50         | 25.0            |
| 56068                        | 595.5                 | 3.24         | 24.1            |
| 56898                        | 605.5                 | 3.56         | 25.1            |
| 57728                        | 615.5                 | 3.55         | 25.1            |
| 58973                        | 630.5                 | 4.04         | 26.6            |
| 59803                        | 640.5                 | 3.22         | 24.0            |
| 61048                        | 655.5                 | 3.30         | 24.3            |
| 61878                        | 665.5                 | 3.82         | 25.9            |
| 62748                        | 675.5                 | 3.62         | 25.3            |
| 64023                        | 685.5                 | 3.71         | 25.6            |
| 65298                        | 695.5                 | 3.61         | 25.3            |
| 66573                        | 705.5                 | 3.70         | 25.6            |
| 67848                        | 715.5                 | 3.66         | 25.4            |
| 69123                        | 725.5                 | 3.80         | 25.9            |
| 70397                        | 735.5                 | 3.97         | 26.4            |
| 71672                        | 745.5                 | 3.78         | 25.8            |
| 74222                        | 765.5                 | 3.74         | 25.7            |
| 78046                        | 795.5                 | 3.46         | 24.8            |
| 79321                        | 805.5                 | 3.64         | 25.4            |
| 82508                        | 830.5                 | 3.72         | 25.6            |
| 86970                        | 865.5                 | 3.72         | 25.6            |
| 89520                        | 885.5                 | 3.75         | 25.7            |
| 93344                        | 915.5                 | 4.22         | 27.1            |

Supplement 3: GeoB20616-1 organic geochemical down-core data. *n*-Alkane isotopic composition and distribution descriptive parameters averaged. The elevated CPI values ranging from 3.8 to 14 indicate that the *n* alkanes within the terrestrial and marine samples were likely derived from nondegraded, terrestrial, higher plant material (Eglinton & Hamilton, 1967). We focus the discussion on the isotopic signals of the *n*-C31 alkane but note that the *n*-C29 and *n*-C33 alkanes reveal similar trends.

| age<br>(cal. yrs<br>BP) | Depth<br>(cm) | $\delta^{13}\text{C}-n\text{C}_{29}$<br>(‰ VPDB) | $\delta^{13}\text{C}-n\text{C}_{31}$<br>(‰ VPDB) | $\delta^{13}\text{C}-n\text{C}_{33}$<br>(‰ VPDB) | $\delta\text{D}-n\text{C}_{29}$<br>(‰ VSMOW) | $\delta\text{D}-n\text{C}_{31}$<br>(‰ VSMOW) | $\delta\text{D}-n\text{C}_{33}$<br>(‰ VSMOW) | CPI <sub>25-33</sub> |
|-------------------------|---------------|--------------------------------------------------|--------------------------------------------------|--------------------------------------------------|----------------------------------------------|----------------------------------------------|----------------------------------------------|----------------------|
| 1504                    | 2             | -26.0                                            | -25.2                                            | -23.3                                            | -133                                         | -147                                         | -150                                         | 6                    |
| 2705                    | 12            | -25.6                                            | -24.8                                            | -23.2                                            | -140                                         | -147                                         | -150                                         | 6                    |
| 3580                    | 22            | -26.2                                            | -25.1                                            | -23.3                                            | -138                                         | -145                                         | -148                                         | 7                    |
| 4442                    | 32            | -26.1                                            | -25.0                                            | -23.2                                            | -144                                         | -147                                         | -151                                         | 7                    |
| 5306                    | 42            | -26.0                                            | -24.8                                            | -23.0                                            | -130                                         | -146                                         | -148                                         | 7                    |
| 6197                    | 52            | -25.7                                            | -25.3                                            | -23.2                                            |                                              |                                              |                                              | 7                    |
| 7535                    | 62            |                                                  |                                                  |                                                  | -140                                         | -147                                         | -148                                         | 7                    |
| 9007                    | 72            | -25.9                                            | -24.9                                            | -23.0                                            | -137                                         | -150                                         | -150                                         | 8                    |
| 10513                   | 82            | -25.2                                            | -24.3                                            | -22.5                                            | -134                                         | -145                                         | -149                                         | 7                    |
| 11985                   | 92            | -24.9                                            | -24.5                                            | -22.4                                            | -136                                         | -150                                         | -151                                         | 8                    |
| 13363                   | 102           | -25.1                                            | -24.4                                            | -22.5                                            | -141                                         | -150                                         | -151                                         | 7                    |
| 14163                   | 112           | -25.2                                            | -24.5                                            | -22.6                                            | -136                                         | -150                                         | -150                                         | 7                    |
| 14871                   | 122           | -25.2                                            | -24.4                                            | -22.5                                            | -145                                         | -151                                         | -151                                         | 8                    |
| 15571                   | 132           | -25.4                                            | -24.5                                            | -22.7                                            | -135                                         | -150                                         | -149                                         | 7                    |
| 16271                   | 142           | -25.5                                            | -24.9                                            | -22.8                                            | -141                                         | -147                                         | -147                                         | 7                    |
| 16979                   | 152           | -24.8                                            | -24.1                                            | -22.2                                            | -139                                         | -148                                         | -145                                         | 7                    |
| 17878                   | 162           | -25.0                                            | -24.7                                            | -22.6                                            | -143                                         | -149                                         | -149                                         | 8                    |
| 18839                   | 172           | -25.2                                            | -24.6                                            | -22.6                                            | -135                                         | -148                                         | -149                                         | 7                    |
| 19822                   | 182           | -24.9                                            | -24.2                                            | -22.3                                            | -138                                         | -149                                         | -151                                         | 7                    |
| 20787                   | 192           | -25.0                                            | -24.3                                            | -22.4                                            | -139                                         | -147                                         | -147                                         | 7                    |
| 21724                   | 202           | -25.1                                            | -24.4                                            | -22.5                                            | -138                                         | -148                                         | -148                                         | 7                    |
| 22300                   | 212           | -25.0                                            | -24.2                                            | -22.4                                            | -130                                         | -147                                         | -148                                         | 7                    |
| 22756                   | 222           | -24.7                                            | -24.1                                            | -22.2                                            | -137                                         | -150                                         | -150                                         | 11                   |
| 23217                   | 232           | -25.0                                            | -24.2                                            | -22.4                                            | -135                                         | -151                                         | -149                                         | 8                    |
| 23673                   | 242           | -25.5                                            | -24.4                                            | -22.5                                            | -135                                         | -151                                         | -150                                         | 7                    |
| 24131                   | 252           | -24.7                                            | -24.2                                            | -22.3                                            | -132                                         | -149                                         | -148                                         | 7                    |
| 24642                   | 262           | -25.3                                            | -24.3                                            | -22.5                                            | -132                                         | -148                                         | -148                                         | 7                    |
| 25187                   | 272           | -25.4                                            | -24.3                                            | -22.4                                            | -131                                         | -147                                         | -148                                         | 7                    |
| 25731                   | 282           | -25.0                                            | -24.0                                            | -22.3                                            | -135                                         | -145                                         | -149                                         | 7                    |
| 26273                   | 292           |                                                  |                                                  |                                                  | -138                                         | -146                                         | -148                                         | 8                    |
| 27880                   | 312           | -25.2                                            | -24.3                                            | -22.4                                            | -138                                         | -144                                         | -148                                         | 7                    |
| 29364                   | 322           | -25.4                                            | -24.3                                            | -22.6                                            | -130                                         | -145                                         | -147                                         | 7                    |
| 30853                   | 332           | -25.4                                            | -24.6                                            | -22.6                                            | -132                                         | -145                                         | -147                                         | 7                    |
| 32351                   | 342           | -25.3                                            | -24.3                                            | -22.5                                            | -142                                         | -149                                         | -151                                         | 7                    |
| 33833                   | 352           | -25.5                                            | -24.5                                            | -22.6                                            | -127                                         | -144                                         | -147                                         | 7                    |
| 35256                   | 362           | -25.9                                            | -25.2                                            | -23.2                                            | -141                                         | -145                                         | -150                                         | 8                    |
| 36591                   | 372           | -25.1                                            | -24.0                                            | -22.1                                            | -133                                         | -148                                         | -152                                         | 8                    |
| 37949                   | 382           | -25.1                                            | -24.2                                            | -22.3                                            | -132                                         | -148                                         | -149                                         | 7                    |
| 39177                   | 392           | -25.0                                            | -24.3                                            | -22.6                                            | -143                                         | -151                                         | -153                                         | 7                    |
| 40007                   | 402           | -24.9                                            | -23.9                                            | -22.2                                            | -137                                         | -152                                         | -152                                         | 8                    |
| 40837                   | 412           | -24.8                                            | -23.9                                            | -22.1                                            | -143                                         | -153                                         | -155                                         | 7                    |
| 41667                   | 422           | -24.8                                            | -23.9                                            | -22.0                                            | -144                                         | -153                                         | -153                                         | 8                    |
| 42497                   | 432           | -24.9                                            | -23.9                                            | -22.1                                            | -142                                         | -152                                         | -154                                         | 8                    |
| 43327                   | 442           | -25.0                                            | -24.0                                            | -22.2                                            | -136                                         | -151                                         | -152                                         | 7                    |
| 44157                   | 452           | -25.3                                            | -24.1                                            | -22.4                                            | -138                                         | -154                                         | -154                                         | 7                    |
| 44987                   | 462           | -24.9                                            | -23.9                                            | -22.2                                            | -137                                         | -153                                         | -154                                         | 7                    |
| 45817                   | 472           | -25.0                                            | -23.9                                            | -22.0                                            | -143                                         | -150                                         | -152                                         | 7                    |
| 46647                   | 482           | -24.7                                            | -23.8                                            | -22.0                                            | -145                                         | -150                                         | -152                                         | 6                    |
| 47477                   | 492           | -25.0                                            | -24.0                                            | -22.1                                            | -138                                         | -153                                         | -154                                         | 7                    |
| 48307                   | 502           | -24.7                                            | -24.0                                            | -22.1                                            | -142                                         | -153                                         | -153                                         | 7                    |
| 49137                   | 512           | -25.0                                            | -24.1                                            | -22.1                                            | -145                                         | -152                                         | -153                                         | 7                    |
| 49967                   | 522           | -24.9                                            | -24.3                                            | -22.2                                            | -143                                         | -154                                         | -155                                         | 7                    |
| 50797                   | 532           | -24.9                                            | -23.9                                            | -22.0                                            | -142                                         | -152                                         | -154                                         | 7                    |
| 51627                   | 542           | -24.9                                            | -23.9                                            | -22.1                                            | -141                                         | -152                                         | -155                                         | 6                    |
| 52457                   | 552           | -24.1                                            | -24.3                                            | -22.7                                            | -139                                         | -151                                         | -154                                         | 7                    |
| 53287                   | 562           | -24.7                                            | -23.6                                            | -22.0                                            | -141                                         | -154                                         | -155                                         | 9                    |
| 54117                   | 572           | -24.4                                            | -23.6                                            | -21.9                                            | -137                                         | -151                                         | -153                                         | 7                    |
| 54947                   | 582           | -24.6                                            | -23.6                                            | -22.1                                            | -147                                         | -153                                         | -154                                         | 7                    |
| 55777                   | 592           | -24.3                                            | -23.6                                            | -22.0                                            | -147                                         | -153                                         | -155                                         | 7                    |
| 56607                   | 602           | -24.8                                            | -23.7                                            | -21.9                                            | -138                                         | -153                                         | -155                                         | 6                    |
| 57437                   | 612           | -24.7                                            | -23.6                                            | -22.1                                            | -147                                         | -156                                         | -156                                         | 7                    |
| 58267                   | 622           | -25.1                                            | -24.1                                            | -22.3                                            | -145                                         | -151                                         | -152                                         | 7                    |
| 59097                   | 632           | -25.1                                            | -24.0                                            | -22.3                                            | -138                                         | -150                                         | -152                                         | 7                    |
| 59927                   | 642           | -25.0                                            | -23.9                                            | -22.1                                            | -134                                         | -147                                         | -148                                         | 6                    |
| 60757                   | 652           | -25.1                                            | -24.1                                            | -22.4                                            | -139                                         | -149                                         | -148                                         | 7                    |
| 61588                   | 662           | -25.1                                            | -24.1                                            | -22.4                                            | -136                                         | -148                                         | -149                                         | 7                    |
| 62418                   | 672           | -25.4                                            | -24.5                                            | -22.8                                            | -132                                         | -149                                         | -148                                         | 7                    |
| 63577                   | 682           | -25.4                                            | -23.9                                            | -22.5                                            | -146                                         | -153                                         | -153                                         | 8                    |
| 64852                   | 692           | -24.8                                            | -24.0                                            | -22.4                                            | -134                                         | -151                                         | -152                                         | 7                    |
| 66127                   | 702           | -25.0                                            | -24.1                                            | -22.6                                            | -134                                         | -150                                         | -151                                         | 7                    |
| 67402                   | 712           | -24.8                                            | -24.1                                            | -22.5                                            | -134                                         | -151                                         | -153                                         | 7                    |
| 68676                   | 722           | -25.1                                            | -24.0                                            | -22.6                                            | -144                                         | -151                                         | -152                                         | 7                    |
| 69951                   | 732           | -25.3                                            | -24.2                                            | -22.8                                            | -138                                         | -154                                         | -156                                         | 7                    |
| 71226                   | 742           | -25.6                                            | -24.1                                            | -22.7                                            | -138                                         | -153                                         | -155                                         | 7                    |
| 72501                   | 752           | -25.4                                            | -24.2                                            | -22.6                                            | -138                                         | -153                                         | -156                                         | 7                    |
| 73776                   | 762           | -25.4                                            | -24.1                                            | -22.6                                            | -140                                         | -152                                         | -153                                         | 7                    |
| 75050                   | 772           | -25.4                                            | -24.1                                            | -22.6                                            | -145                                         | -151                                         | -153                                         | 7                    |
| 76325                   | 782           | -26.3                                            | -24.5                                            | -23.0                                            | -137                                         | -147                                         | -150                                         | 6                    |
| 77728                   | 793           | -25.8                                            | -24.4                                            | -22.7                                            | -142                                         | -151                                         | -154                                         | 8                    |
| 78875                   | 802           | -25.2                                            | -24.2                                            | -22.3                                            | -153                                         | -157                                         | -159                                         | 7                    |
| 80150                   | 812           | -25.3                                            | -24.0                                            | -22.3                                            | -137                                         | -157                                         | -159                                         | 6                    |
| 81425                   | 822           | -25.3                                            | -23.9                                            | -22.3                                            | -149                                         | -156                                         | -159                                         | 6                    |
| 82699                   | 832           | -24.0                                            | -23.8                                            | -22.2                                            | -137                                         | -154                                         | -155                                         | 5                    |
| 83974                   | 842           | -25.5                                            | -24.2                                            | -22.6                                            | -144                                         | -151                                         | -153                                         | 6                    |
| 85249                   | 852           | -25.6                                            | -24.5                                            | -22.8                                            | -141                                         | -147                                         | -152                                         | 7                    |
| 86524                   | 862           | -26.2                                            | -24.9                                            | -23.1                                            | -142                                         | -146                                         | -151                                         | 1                    |
| 87799                   | 872           | -25.9                                            | -24.5                                            | -22.8                                            | -146                                         | -156                                         | -157                                         | 6                    |
| 89074                   | 882           | -26.2                                            | -24.6                                            | -22.9                                            | -147                                         | -157                                         | -157                                         | 6                    |
| 90348                   | 892           | -25.8                                            | -24.4                                            | -22.7                                            | -151                                         | -158                                         | -161                                         | 7                    |
| 91623                   | 902           | -26.1                                            | -24.5                                            | -22.9                                            | -150                                         | -159                                         | -160                                         | 6                    |
| 92898                   | 912           | -26.4                                            | -25.0                                            | -22.9                                            | -139                                         | -154                                         | -157                                         | 7                    |
| 94173                   | 922           | -26.6                                            | -25.2                                            | -23.1                                            | -141                                         | -155                                         | -158                                         | 7                    |
| 95448                   | 932           | -26.3                                            | -25.7                                            | -23.6                                            | -134                                         | -144                                         | -146                                         | 7                    |

## Supplement 4: GeoB20616-1 inorganic geochemical down-core data from

| depth<br>(cm) | age<br>(cal. years BP) | Al<br>(mg/kg) | Ca<br>(mg/kg) | Fe<br>(mg/kg) | K<br>(mg/kg) |
|---------------|------------------------|---------------|---------------|---------------|--------------|
| 5.5           | 2141                   | 41601         | 177248        | 27139         | 8911         |
| 10.5          | 2575                   | 40009         | 184378        | 26882         | 8863         |
| 15.5          | 3008                   | 33894         | 202638        | 23765         | 8045         |
| 20.5          | 3446                   | 32489         | 209794        | 22430         | 7864         |
| 25.5          | 3891                   | 42712         | 174836        | 30180         | 10010        |
| 30.5          | 4315                   | 51353         | 145437        | 36638         | 11646        |
| 35.5          | 4741                   | 52964         | 143556        | 38025         | 12066        |
| 40.5          | 5179                   | 61319         | 114217        | 41607         | 13549        |
| 45.5          | 5600                   | 62755         | 114701        | 43780         | 13466        |
| 50.5          | 6032                   | 76367         | 67954         | 51567         | 15949        |
| 55.5          | 6602                   | 64118         | 106827        | 43037         | 13586        |
| 60.5          | 7317                   | 81808         | 55271         | 53594         | 16917        |
| 65.5          | 8040                   | 78369         | 59242         | 50854         | 16399        |
| 70.5          | 8781                   | 75738         | 70803         | 48374         | 15809        |
| 75.5          | 9523                   | 78203         | 60655         | 52427         | 16661        |
| 80.5          | 10290                  | 78352         | 59011         | 51635         | 16528        |
| 85.5          | 11035                  | 77321         | 59370         | 54169         | 16743        |
| 90.5          | 11767                  | 76465         | 63916         | 55399         | 16351        |
| 95.5          | 12501                  | 75170         | 61400         | 53243         | 16427        |
| 100.5         | 13211                  | 77240         | 61674         | 55229         | 16505        |
| 105.5         | 13696                  | 74527         | 68091         | 55522         | 16528        |
| 110.5         | 14057                  | 74176         | 67078         | 52330         | 15914        |
| 115.5         | 14409                  | 71905         | 75806         | 48928         | 15316        |
| 120.5         | 14766                  | 68726         | 82184         | 47674         | 15031        |
| 125.5         | 15118                  | 64537         | 95917         | 45311         | 13962        |
| 130.5         | 15468                  | 61688         | 99668         | 41571         | 13308        |
| 135.5         | 15813                  | 59928         | 106381        | 41391         | 13475        |
| 140.5         | 16168                  | 62339         | 102200        | 42106         | 13815        |
| 145.5         | 16512                  | 53917         | 124124        | 38125         | 12401        |
| 150.5         | 16868                  | 53583         | 129426        | 38349         | 12385        |
| 155.5         | 17255                  | 62403         | 104697        | 43747         | 13950        |
| 160.5         | 17734                  | 66270         | 88069         | 48473         | 14453        |
| 165.5         | 18215                  | 56286         | 115156        | 39825         | 13046        |
| 170.5         | 18696                  | 67792         | 80244         | 44942         | 14654        |
| 175.5         | 19176                  | 66981         | 88478         | 45807         | 14197        |
| 180.5         | 19674                  | 62491         | 95931         | 42658         | 13873        |
| 185.5         | 20162                  | 65334         | 99870         | 47296         | 14113        |
| 190.5         | 20643                  | 62511         | 102887        | 41707         | 13467        |
| 195.5         | 21125                  | 66868         | 96885         | 48235         | 14988        |
| 200.5         | 21597                  | 67068         | 89420         | 49711         | 15021        |
| 205.5         | 22000                  | 69028         | 90573         | 44979         | 14341        |
| 210.5         | 22233                  | 60283         | 114739        | 42526         | 13499        |
| 215.5         | 22458                  | 69104         | 88862         | 45349         | 14645        |
| 220.5         | 22687                  | 70456         | 88409         | 45770         | 14638        |
| 225.5         | 22917                  | 72078         | 84770         | 46615         | 14792        |
| 230.5         | 23146                  | 65131         | 103541        | 43173         | 13557        |
| 235.5         | 23379                  | 56941         | 129414        | 38257         | 12407        |
| 240.5         | 23605                  | 60846         | 120300        | 40670         | 12692        |
| 245.5         | 23832                  | 57609         | 129981        | 41183         | 12521        |
| 250.5         | 24063                  | 58536         | 123484        | 41087         | 12795        |
| 255.5         | 24298                  | 58042         | 123364        | 40032         | 12580        |
| 260.5         | 24562                  | 57797         | 129772        | 43387         | 13060        |
| 280.5         | 25648                  | 60102         | 118404        | 40438         | 13120        |
| 285.5         | 25922                  | 59111         | 122979        | 41101         | 12896        |
| 290.5         | 26193                  | 60619         | 123278        | 41523         | 12833        |
| 295.5         | 26461                  | 48348         | 167591        | 34485         | 10447        |
| 300.5         | 26733                  | 44819         | 174138        | 31605         | 10008        |
| 305.5         | 27045                  | 44879         | 172727        | 32203         | 10102        |
| 310.5         | 27652                  | 45798         | 169598        | 32696         | 10287        |
| 315.5         | 28407                  | 51376         | 146621        | 36184         | 11618        |
| 320.5         | 29142                  | 45342         | 164907        | 31759         | 10547        |
| 325.5         | 29884                  | 54584         | 140547        | 36636         | 12082        |
| 330.5         | 30625                  | 49338         | 155126        | 34580         | 11003        |
| 335.5         | 31378                  | 49564         | 154649        | 34299         | 11218        |
| 340.5         | 32130                  | 52464         | 140437        | 37184         | 11815        |
| 345.5         | 32869                  | 53070         | 137093        | 36736         | 11702        |
| 350.5         | 33615                  | 53940         | 137642        | 38276         | 12143        |
| 355           | 34273                  | 55917         | 113821        | 35189         | 12547        |
| 355.5         | 34346                  | 56963         | 129853        | 40731         | 12948        |
| 360           | 34982                  | 56742         | 111906        | 36524         | 12790        |
| 360           | 34982                  | 51631         | 124407        | 35717         | 11300        |
| 360.5         | 35050                  | 57729         | 127739        | 40217         | 12990        |
| 365           | 35663                  | 55346         | 112114        | 34237         | 12311        |
| 365.5         | 35731                  | 56217         | 128293        | 39866         | 12775        |
| 370           | 36319                  | 52984         | 117699        | 35315         | 11500        |
| 370           | 36319                  | 54704         | 116866        | 36474         | 12137        |
| 370.5         | 36386                  | 57846         | 110492        | 39138         | 13301        |
| 375.5         | 37069                  | 66718         | 83800         | 46061         | 14718        |
| 380           | 37677                  | 66930         | 72739         | 41065         | 14458        |
| 380           | 37677                  | 64675         | 79088         | 44574         | 13757        |
| 380.5         | 37744                  | 65197         | 85613         | 44766         | 14634        |
| 385.5         | 38427                  | 64755         | 94671         | 44168         | 14123        |
| 390           | 39011                  | 63041         | 93578         | 42042         | 12755        |
| 390.5         | 39052                  | 64839         | 97063         | 45540         | 13991        |
| 395.5         | 39467                  | 64293         | 101333        | 43352         | 13659        |
| 400           | 39841                  | 56336         | 111917        | 37771         | 11815        |
| 400.5         | 39882                  | 59540         | 116418        | 40174         | 12958        |
| 405           | 40256                  | 60525         | 101730        | 35780         | 13075        |
| 405.5         | 40297                  | 60053         | 113436        | 41620         | 13286        |
| 410           | 40671                  | 56134         | 111014        | 37702         | 11909        |
| 410.5         | 40712                  | 61267         | 115181        | 40783         | 13059        |
| 415.5         | 41127                  | 68070         | 96946         | 45136         | 14410        |
| 420           | 41501                  | 60132         | 92248         | 41222         | 12966        |
| 420.5         | 41542                  | 63673         | 107364        | 44591         | 13908        |
| 425           | 41916                  | 64280         | 79834         | 42446         | 14274        |
| 425.5         | 41957                  | 67059         | 90673         | 43957         | 14495        |
| 430           | 42331                  | 66538         | 74768         | 44034         | 13772        |
| 430.5         | 42372                  | 74425         | 72721         | 49023         | 16000        |
| 435           | 42746                  | 68276         | 73664         | 46167         | 14581        |
| 435.5         | 42787                  | 74586         | 74830         | 48272         | 15428        |
| 440           | 43161                  | 68894         | 68864         | 42636         | 13686        |
| 440.5         | 43202                  | 73481         | 85417         | 52971         | 15420        |
| 445           | 43576                  | 63726         | 90121         | 43258         | 13714        |
| 445.5         | 43617                  | 70805         | 90745         | 47880         | 14455        |
| 450           | 43991                  | 62794         | 94709         | 41966         | 12541        |

|       |       |       |        |       |       |
|-------|-------|-------|--------|-------|-------|
| 450.5 | 44032 | 66645 | 102400 | 44605 | 14024 |
| 455.5 | 44447 | 63058 | 110000 | 43305 | 13270 |
| 460   | 44821 | 60234 | 103253 | 41532 | 12445 |
| 460   | 44821 | 63467 | 94432  | 41145 | 13774 |
| 460.5 | 44862 | 66633 | 99157  | 45814 | 14019 |
| 465.5 | 45277 | 63091 | 106734 | 43179 | 13627 |
| 470   | 45651 | 58903 | 94189  | 39768 | 12457 |
| 470.5 | 45692 | 63933 | 103868 | 45098 | 14305 |
| 475   | 46066 | 60994 | 86668  | 37042 | 13787 |
| 475.5 | 46107 | 61837 | 98873  | 41100 | 14153 |
| 480   | 46481 | 56561 | 90832  | 40272 | 12613 |
| 480.5 | 46522 | 66192 | 89069  | 45694 | 14571 |
| 485.5 | 46937 | 67609 | 86077  | 46304 | 14804 |
| 490   | 47311 | 62425 | 78589  | 42526 | 13456 |
| 490.5 | 47352 | 73996 | 74298  | 50343 | 15312 |
| 495   | 47726 | 63854 | 82115  | 42127 | 14185 |
| 495.5 | 47767 | 70040 | 79558  | 47674 | 14918 |
| 500   | 48141 | 58443 | 92436  | 39597 | 12792 |
| 500.5 | 48182 | 67806 | 89654  | 41300 | 14255 |
| 505.5 | 48597 | 64302 | 95964  | 42143 | 13817 |
| 510   | 48971 | 56298 | 89156  | 36482 | 12774 |
| 510.5 | 49012 | 58933 | 107154 | 37850 | 13198 |
| 515.5 | 49427 | 56637 | 121832 | 39000 | 13166 |
| 520   | 49801 | 69152 | 66613  | 44369 | 14418 |
| 520.5 | 49842 | 61249 | 102619 | 40085 | 14223 |
| 525.5 | 50258 | 59082 | 98837  | 38056 | 13993 |
| 530   | 50631 | 63717 | 71262  | 40987 | 13969 |
| 530.5 | 50673 | 62272 | 86967  | 41175 | 14570 |
| 535.5 | 51088 | 66636 | 77489  | 41972 | 15207 |
| 540   | 51461 | 67956 | 65810  | 40760 | 14770 |
| 540.5 | 51503 | 68530 | 79364  | 46688 | 15272 |
| 545.5 | 51918 | 71167 | 71372  | 47010 | 16052 |
| 550.5 | 52333 | 69486 | 77430  | 47457 | 15274 |
| 555.5 | 52748 | 73000 | 67616  | 47939 | 15957 |
| 560   | 53121 | 70124 | 57144  | 42084 | 15288 |
| 560   | 53121 | 65831 | 79730  | 43561 | 13966 |
| 560.5 | 53163 | 70140 | 86254  | 47706 | 15075 |
| 565.5 | 53578 | 72087 | 78510  | 46632 | 15068 |
| 570   | 53951 | 66312 | 82360  | 42526 | 14264 |
| 570   | 53951 | 66194 | 76845  | 43042 | 13921 |
| 580   | 54781 | 66247 | 80417  | 44078 | 14268 |
| 580   | 54781 | 68014 | 77544  | 46462 | 13950 |
| 590   | 55611 | 66355 | 83582  | 44236 | 14347 |
| 590   | 55611 | 65058 | 82253  | 45714 | 13717 |
| 600   | 56441 | 61234 | 89130  | 40404 | 13039 |
| 610   | 57271 | 55032 | 110938 | 38905 | 12495 |
| 610   | 57271 | 58564 | 100873 | 40606 | 12782 |
| 620   | 58101 | 45455 | 139095 | 31370 | 10910 |
| 620   | 58101 | 44378 | 145060 | 31074 | 10138 |
| 625   | 58516 | 43060 | 142267 | 29805 | 10433 |
| 630   | 58931 | 42528 | 144291 | 29578 | 9941  |
| 635   | 59346 | 42342 | 162679 | 30808 | 10345 |
| 640   | 59761 | 43435 | 145528 | 30639 | 10129 |
| 645   | 60176 | 43778 | 146212 | 29584 | 10425 |
| 650   | 60591 | 42732 | 148481 | 29140 | 10062 |
| 660   | 61422 | 51553 | 125405 | 35513 | 11277 |
| 670   | 62252 | 61084 | 96695  | 42103 | 12882 |
| 670   | 62252 | 64483 | 93359  | 45537 | 13816 |
| 680   | 63322 | 67129 | 77902  | 46161 | 14021 |
| 680   | 63322 | 62970 | 93170  | 43272 | 13659 |
| 690   | 64597 | 67932 | 76483  | 44205 | 13923 |
| 690   | 64597 | 68020 | 73796  | 46466 | 14663 |
| 700   | 65872 | 67826 | 80960  | 48905 | 14043 |
| 710   | 67147 | 58768 | 103678 | 40525 | 12421 |
| 710   | 67147 | 62192 | 95677  | 50634 | 13671 |
| 720   | 68421 | 62300 | 100698 | 43941 | 13308 |
| 720   | 68421 | 59517 | 102095 | 41114 | 12571 |
| 730   | 69696 | 51990 | 130019 | 36401 | 11173 |
| 730   | 69696 | 60917 | 103143 | 43866 | 13069 |
| 740   | 70971 | 42149 | 152024 | 32335 | 9772  |
| 740   | 70971 | 48978 | 143668 | 38215 | 11380 |
| 750   | 72246 | 48501 | 141805 | 34406 | 11020 |
| 760   | 73521 | 45861 | 150455 | 33980 | 10725 |
| 760   | 73521 | 47125 | 143183 | 34141 | 10539 |
| 770   | 74795 | 42528 | 162159 | 31551 | 10067 |
| 770   | 74795 | 39344 | 169696 | 30045 | 9127  |
| 780   | 76070 | 34419 | 192887 | 25895 | 8236  |
| 780   | 76070 | 31427 | 202857 | 23010 | 7502  |
| 790   | 77345 | 35777 | 183667 | 26151 | 8677  |
| 790   | 77345 | 35244 | 183499 | 24784 | 8237  |
| 800   | 78620 | 51577 | 132777 | 38252 | 11201 |
| 810   | 79895 | 55158 | 111085 | 40599 | 11873 |
| 820   | 81170 | 50305 | 125661 | 37449 | 11178 |
| 825   | 81807 | 52630 | 126976 | 38524 | 12155 |
| 830   | 82444 | 48311 | 141565 | 35482 | 10618 |
| 835   | 83082 | 48136 | 145329 | 35219 | 11257 |
| 840   | 83719 | 47482 | 150996 | 34356 | 10533 |
| 850   | 84994 | 32646 | 192928 | 21969 | 7706  |
| 860   | 86269 | 22912 | 239594 | 17648 | 5737  |
| 860   | 86269 | 26057 | 230951 | 18877 | 6348  |
| 870   | 87544 | 28890 | 213965 | 20328 | 6753  |
| 870   | 87544 | 52404 | 134379 | 37382 | 11542 |
| 880   | 88819 | 62396 | 105431 | 42914 | 13482 |
| 880   | 88819 | 57738 | 112182 | 39138 | 11802 |
| 890   | 90093 | 54070 | 123836 | 39282 | 11467 |
| 890   | 90093 | 61059 | 108961 | 41761 | 13009 |
| 900   | 91368 | 63645 | 102706 | 44565 | 13416 |
| 900   | 91368 | 62597 | 112688 | 41009 | 13450 |
| 910   | 92643 | 61222 | 107700 | 40574 | 12949 |
| 910   | 92643 | 62867 | 108253 | 42496 | 13677 |
| 920   | 93918 | 55146 | 133032 | 37836 | 11767 |
| 920   | 93918 | 55676 | 134602 | 38464 | 12232 |
| 930   | 95193 | 51392 | 139805 | 33200 | 11087 |
| 930   | 95193 | 50522 | 153534 | 33390 | 11269 |
| 940   | 96468 | 44837 | 163431 | 28193 | 9756  |
| 940   | 96468 | 22365 | 244843 | 14395 | 5517  |
| 950   | 97742 | 21712 | 244971 | 13257 | 5156  |
